# Supplementary material for: No Evidence for Association of Autism with Rare Heterozygous Point Mutations in Contactin-Associated Protein-Like 2 (CNTNAP2), or in Other Contactin-Associated Proteins or Contactins
Source: PLOS journal article supplement (doi:10.1371/journal.pgen.1004852), 2015-01-26
Supplement: S7 (10.1371/journal.pgen.1004852.s007) [file journal.pgen.1004852.s007]

| Table S6. SIFT-or-PolyPhen2 deleterious* singleton inheritance | | | |
| --- | --- | --- | --- |
| Gene | Number paternal | Number maternal | One-tailed binomial p-value |
| *CNTN1* | 6 | 3 | 0.2539 |
| *CNTN2* | 4 | 6 | 0.3770 |
| *CNTN3* | 2 | 1 | 0.5 |
| *CNTN4* | 5 | 2 | 0.2266 |
| *CNTN5* | 4 | 5 | 0.5 |
| *CNTN6* | 4 | 6 | 0.3770 |
| *CNTNAP1* | 5 | 4 | 0.5 |
| *CNTNAP2* | 4 | 9 | 0.1334 |
| *CNTNAP4* | 4 | 7 | 0.2668 |
| *CNTNAP5* | 3 | 3 | 0.5 |

*Deleterious mutations were defined as “damaging” in SIFT and/or “possibly damaging” or “probably damaging” in PolyPhen2, as well as all nonsense and splice site mutations which were not evaluated by these programs but were regarded as deleterious intrinsically
