# Supplementary material for: No Evidence for Association of Autism with Rare Heterozygous Point Mutations in Contactin-Associated Protein-Like 2 (CNTNAP2), or in Other Contactin-Associated Proteins or Contactins
Source: PLOS journal article supplement (doi:10.1371/journal.pgen.1004852), 2015-01-26
Supplement: S9 (10.1371/journal.pgen.1004852.s009) [file journal.pgen.1004852.s009]

| Table S8. Combined 2008, Discovery and Baylor-Broad *CNTNAP2* Data – Deleterious Singletons* | | | | |
| --- | --- | --- | --- | --- |
|  | 2008 cohort (635 cases and 942 controls) | Discovery cohort (1030 cases and 942 controls) | Baylor-Broad (1039 cases and 863 controls) | Cumulative (2704 cases and 2747 controls) |
| Case variants | 3 | 12 | 7 | 22 |
| Control variants | 6 | 11 | 6 | 23 |
| One-tailed Fisher exact p-value | 0.476 | 0.580 | 0.584 | 0.521 |
